# Supplementary material for: TNF-α-Mediated Endothelial Cell Apoptosis Is Rescued by Hydrogen Sulfide
Source: MDPI journal article supplement (doi:10.3390/antiox12030734), 2023-03-16
Supplement: s1 [file s1]

## Supplementary Figures

**Table S1.** List of forward and reverse primers sequences used in RT-qPCR analysis.

| Target Gene | Forward 5'→ 3'          | Reverse 5'→ 3'        |
|-------------|-------------------------|-----------------------|
| <b>EEF2</b> | TGAACAAGATGGACCGCG      | GGATCGATCATGATGTTGCC  |
| <b>Trx1</b> | GTGAAGCAGATCGAGAGCAAG   | CGTGGCTGAGAAGTCAACTAC |
| <b>DRP1</b> | AAGCTGCTGCCATAGTCCTC    | ACCACAGCCATGTCAGTGTC  |
| <b>MNF1</b> | GTCGCAAACCTCTGAATCAACAC | ATCTTTCCATGTGCTGTCTGC |
| <b>SOD2</b> | TAGGGCTGAGGTTTGTCCAG    | GGAGAAGTACCAGGAGGCGT  |

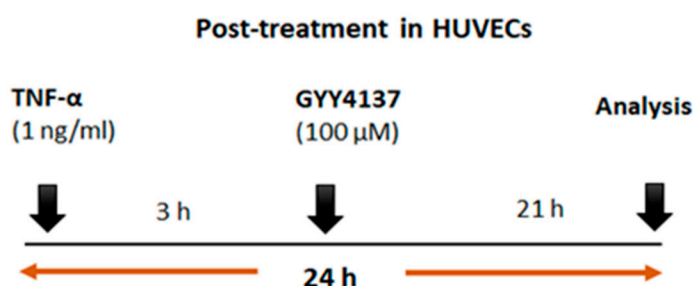

**Figure S1.** Scheme of the experimental schedule for HUVECs treated with TNF- $\alpha$  and GYY4137 (h=hours). Cells were treated with TNF- $\alpha$  (1 ng/ml, 3h) or vehicle (medium, untreated cells) followed by post-treatment with GYY4137 (100  $\mu$ M, 21 h).

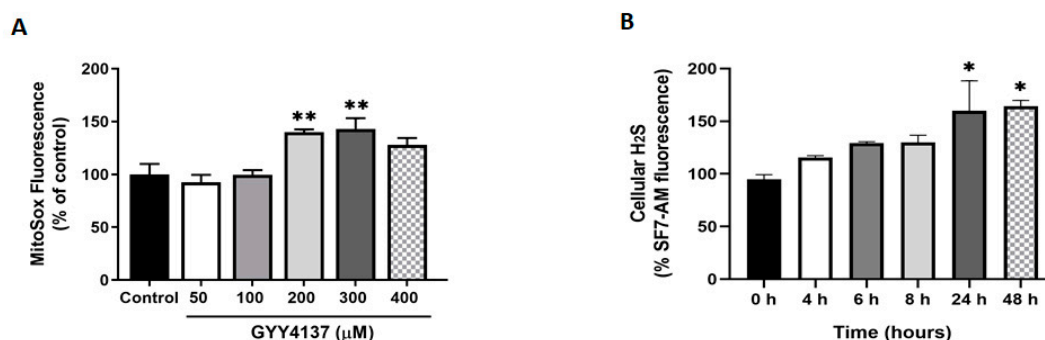

**Figure S2.** Determination of non-toxic concentration of GYY4137 and effect of H<sub>2</sub>S content in HUVECs. **(A)** Quantification of superoxide formation in dose-dependent GYY4137 treatment in HUVECs by MitoSox staining. **(B)** Intracellular H<sub>2</sub>S content in a time-dependent GYY4137 (100  $\mu$ M) treatment in HUVECs. Statistic significant differences were calculated using the one-way ANOVA followed by Dunnett's comparison test. Data are shown as means  $\pm$  SD; \*p<0.05 and \*\*p<0.01 vs. control, (n=3).

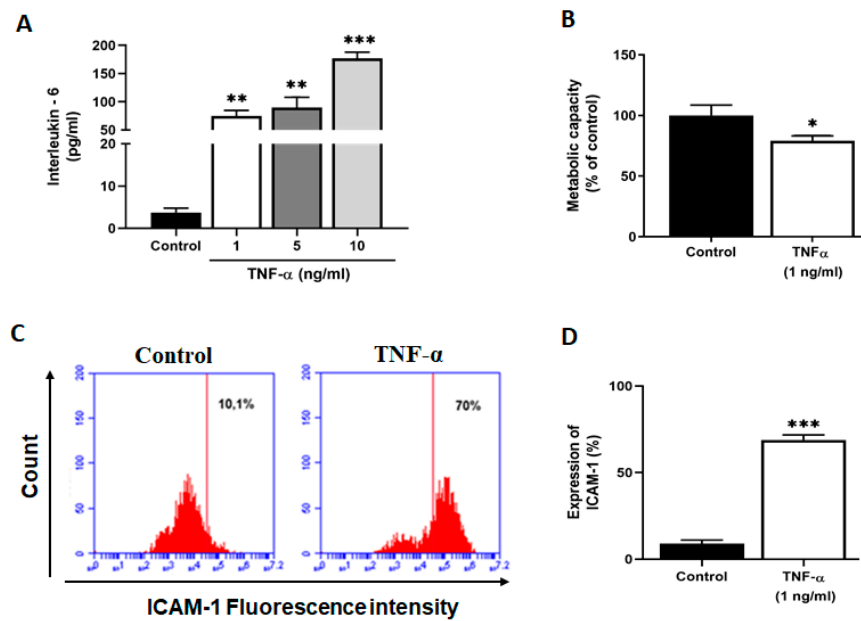

**Figure S3. Activation of endothelial cells by TNF- $\alpha$  treatment.** (A) HUVECs were treated with dose-dependent TNF- $\alpha$  for 3 h before supernatant was collected. Secretion of interleukin 6 (IL-6) was analysed by ELISA. (B) Metabolic activity of viable cells in the presence of TNF- $\alpha$  treatment by CellTiter Blue assay. (C,D) Intercellular cell adhesion molecule (ICAM-1) expression was analysed by cell stained with CD54 antibody (APC) and ICAM-1 expression in cells with or without TNF- $\alpha$  (1 ng/ml, 3h) was analysed by flow cytometry. Statistic significant differences were calculated using the Student *t*-test and one-way ANOVA followed by Dunnett's comparison test. Data are shown as means  $\pm$  SD; \* $p$ <0.05, \*\* $p$ <0.01 and \*\*\* $p$ <0.001 vs. control, (n=3).

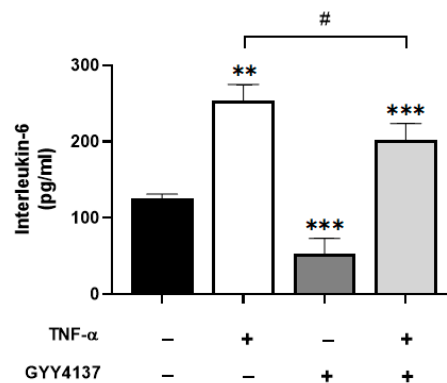

**Figure S4. Effects of GYY4137 on IL-6 content in TNF- $\alpha$ -treated HUVECs.** Endothelial cells were treated with TNF- $\alpha$  (1 ng/ml, 3h) followed by post-treatment with GYY4137 (100  $\mu$ M, 21h). Supernatant was collected and IL-6 secretion was analysed by ELISA assay. Statistic significant differences were calculated using one-way ANOVA for Tukey's comparison test. Data are shown as means  $\pm$  SD; \*\* $p$ <0.01 and \*\*\* $p$ <0.001 vs. control, (n=3).

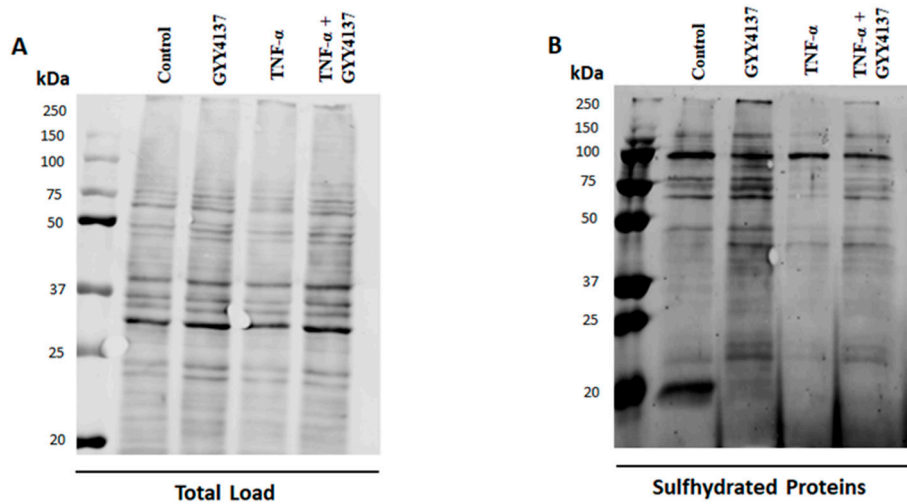

**Figure S5.** GYY4137 post-treatment increases sulfhydrylation of proteins. (A) detection of total proteins and (B) total S-sulfhydrated proteins after Biotin switch assay using Revert™ 700 Total protein stain kit.

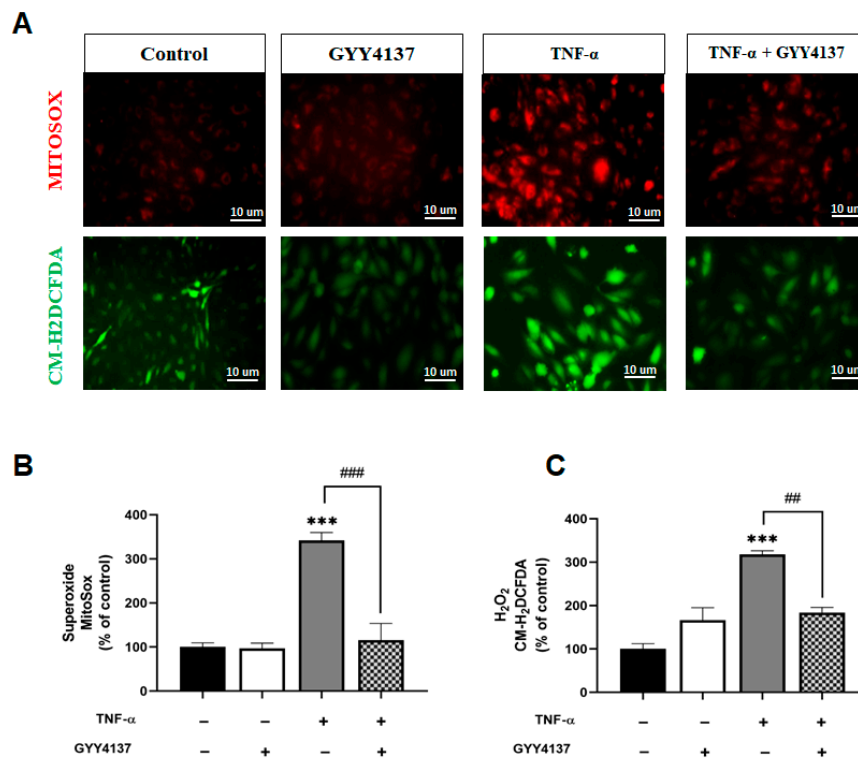

**Figure S6.** Effects of GYY4137 on oxidants in TNF- $\alpha$ -treated HUVECs. (A) Representative images of HUVECs stained with MitoSox probe (red) and CM-H<sub>2</sub>DCFDA probe (green). Scale bar 10  $\mu$ m. (B) Quantification of superoxide and (C) H<sub>2</sub>O<sub>2</sub> levels in endothelial cells. P-values were calculated using one-way ANOVA followed by Tukey's comparison test. Data are shown as means  $\pm$  SD; \*\*\*p<0.0001 vs. control. ##p<0.01 and ###p<0.0001 vs. TNF- $\alpha$ -treated groups only (n=4-7).
